# Supplementary material
Source: HighWire-hosted journal article supplement (https://openheart.bmj.com/content/12/1/e003030)

**A**      **0~1 years old**

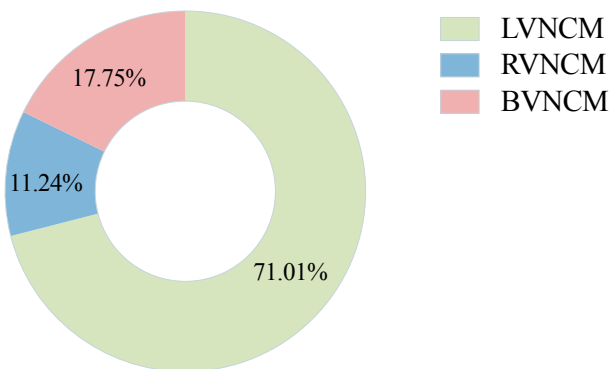

Total=169

**B**      **1~18 years old**

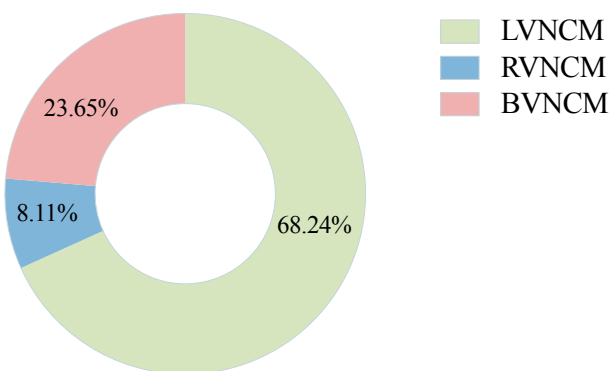

Total=148

**C**      **>18 years old**

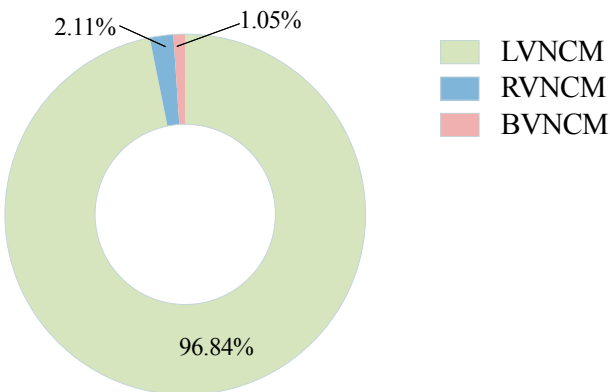

Total=95

Supplement: inline-supplementary-material-1 [file inline-supplementary-material-1.pdf]

## A 0~1 years old

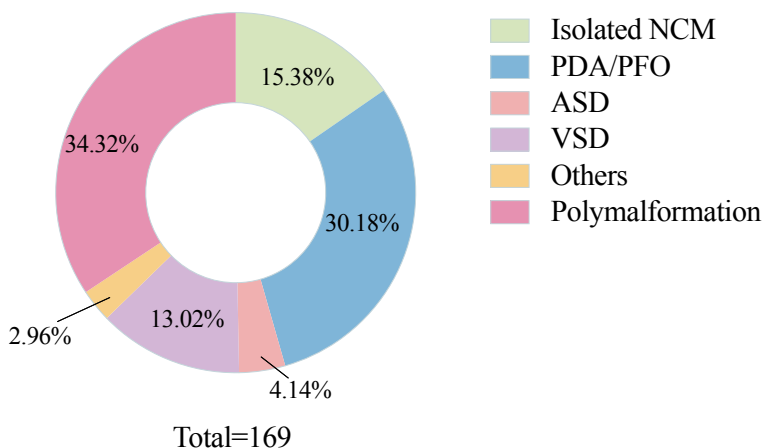

## B 1~18 years old

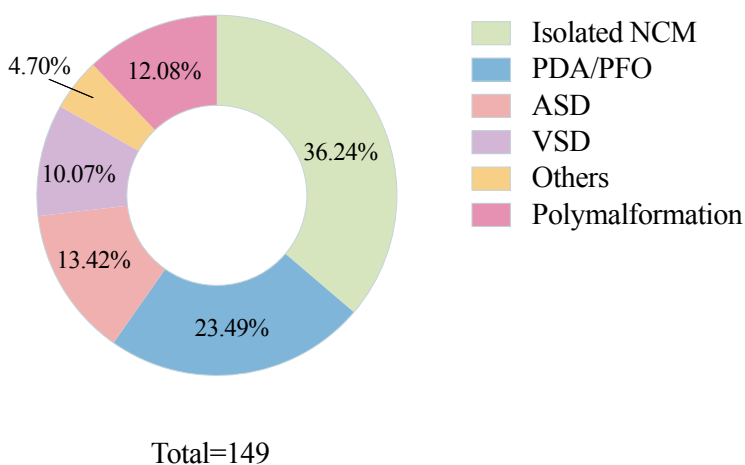

## C >18 years old

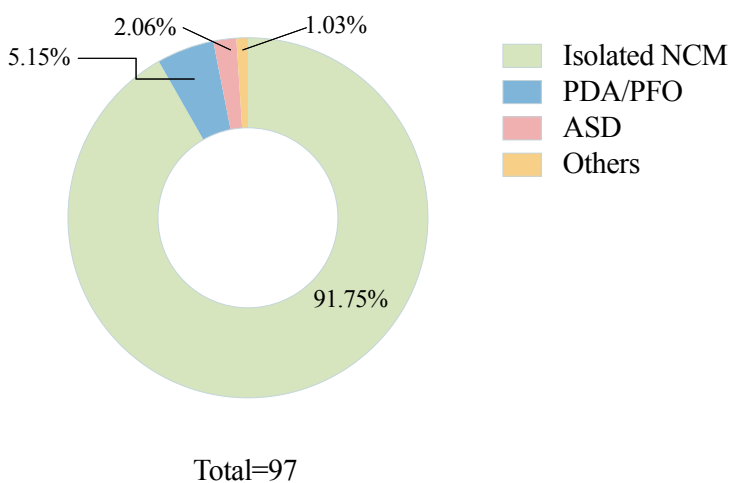

Supplement: inline-supplementary-material-3 [file inline-supplementary-material-3.pdf]
